# Supplementary material for: Minority Women in Science--A Statistical View. National Network of Minority Women in Science.
Source: Frontiers journal article supplement (doi:10.3389/fpsyg.2022.953600), 1983-01-01
Supplement: Data_Sheet_1.pdf [file Data_Sheet_1.pdf]

## APPENDIX:

### Questionnaires on Top Students' English Use and Learning

#### Section One:

1. Age: \_\_\_\_\_
2. Gender: \_\_\_\_\_
3. Major/Program: \_\_\_\_\_
4. Year of study: \_\_\_\_\_
5. I have been using English for \_\_\_\_\_ hours per day after entering university.  
a.  $\leq 1$  hour      b. 1.5-2.5 hours      c. 3-4.5 hours      d.  $\geq 5$  hours
6. The most recent standardized English test that I have taken was \_\_\_\_\_,  
and the score I got was \_\_\_\_\_.

Please choose the option that fits your condition the most. (1 = not at all satisfied, 10 = very satisfied)

7. My evaluation on my overall English proficiency: (    )
8. My evaluation on my speaking proficiency in English: (    )
9. My evaluation on my listening proficiency in English: (    )
10. My evaluation on my reading proficiency in English: (    )
11. My evaluation on my writing proficiency in English: (    )

#### Section Two:

Please choose the option that fits your condition the most.

(1 = strongly disagree, 2 = disagree, 3 = not sure, 4 = agree, 5 = strongly agree)

12. I don't usually get anxious when I have to respond to a question in English. (    )
13. I am always afraid that the other students would laugh at me if I speak up in English.  
(    )
14. I always feel that the other students are more at ease than I am in English learning. (    )
15. I am never embarrassed to volunteer answers in English. (    )
16. I am generally tense whenever participating in activities in English. (    )
17. I never understand why other students are so nervous when using English. (    )
18. I usually feel relaxed and confident when participating in activities in English. (    )
19. Whenever I have to answer a question in English, out loud, I would get nervous and  
confused. (    )
20. I tell myself that I need to keep studying to improve my English competence. (    )
21. I persuade myself to keep on learning English to find out how much I can learn. (    )
22. I tell myself that I should keep on learning English to become good at it. (    )
23. I remind myself about how important it is to get good grades in English. (    )
24. I tell myself that it is important to practice English to outperform my peers. (    )
25. I believe I have the ability to learn a language successfully. (    )
26. I believe I have the ability to get the score I am trying for in my next English test. (    )
27. I believe I know how to find an effective way to learn English. (    )
28. I learn English because it is a required class. (    )
29. I learn English because I want to have high GPA. (    )
30. I learn English because I want to study abroad later. (    )
31. I learn English because I want to travel in English-speaking countries. (    )
32. I learn English because I want to prove I am a good student. (    )
33. I learn English because if I do poorly in it, I will feel I lose face. (    )
34. I learn English because my friends all learn English well. (    )

- 35. I learn English because it is important to my future development. (    )
- 36. I learn English because I want to master a foreign language. (    )
- 37. I learn English because I want to be someone who is good at English. (    )
- 38. I learn English for the pleasure I experience in learning. (    )
- 39. I learn English for the good feeling I get in learning it well. (    )
- 40. I learn English for the satisfied feeling I get in knowing new things of English. (    )
- 41. I learn English for the pleasure I experience when I do well in English. (    )
- 42. I learn English for the enjoyment I experience when having a high score in exams. (    )
- 43. I learn English for the satisfied feeling when I master difficult words. (    )
- 44. I learn English for the good feeling when I hear English spoken by other people. (    )
- 45. I learn English for the good feeling when I speak English. (    )
- 46. I learn English for the pleasure I get from knowing a difficult English words around me.  
(    )
